# Supplementary material for: Testing the treatment effect on competing causes of death in oncology clinical trials
Source: PubMed Central journal article supplement (PMC4047005; doi:10.1186/1471-2288-14-72), 2014-05-29
Supplement: 1471-2288-14-72-S1.pdf [file 1471-2288-14-72-S1.pdf]

# Additional material for “Testing the treatment effect on competing causes of death in oncology clinical trials”

F. Rotolo and S. Michiels

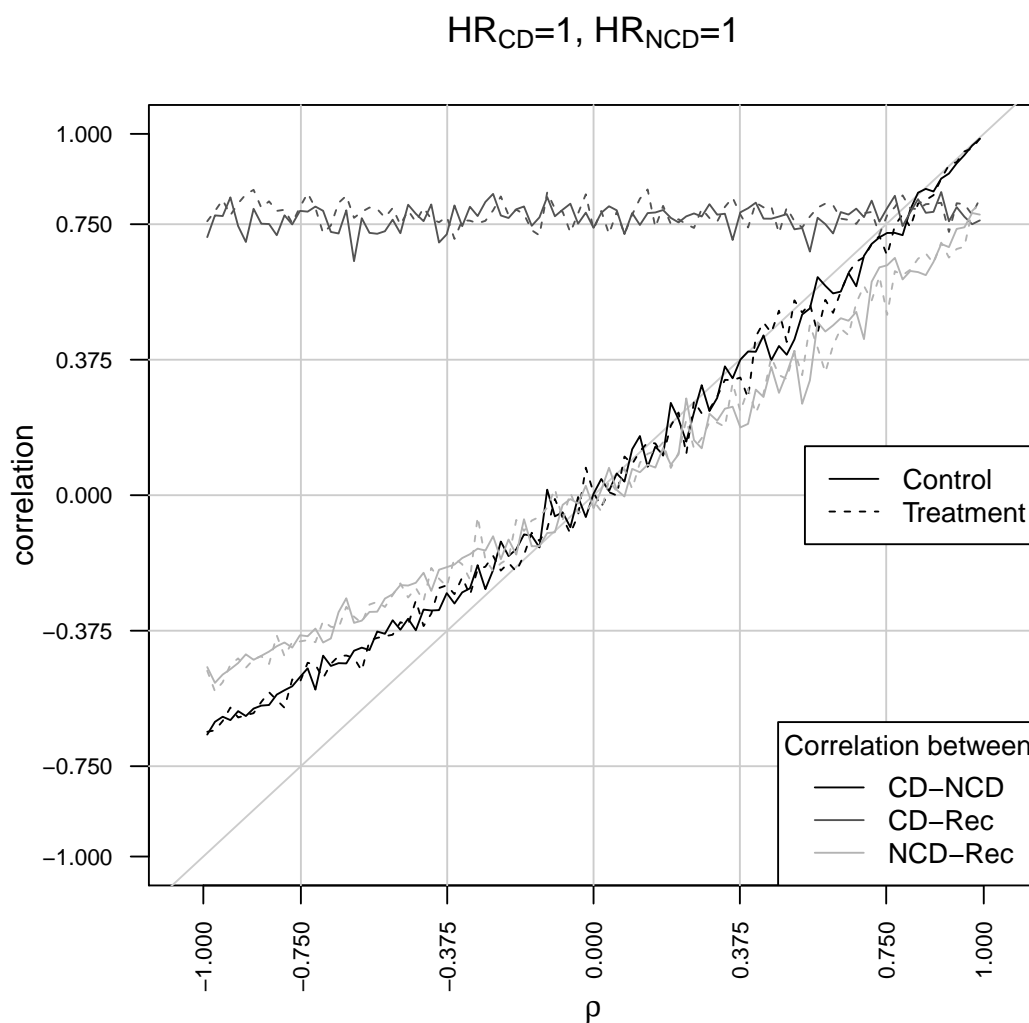

Figure A.1: **Correlations between the three event times.** Pairwise correlations between the three event times in the first scenario considered for the simulation study, as a function of  $\rho$ , the correlation between the normal random variables used for data generation. The tick marks correspond to the five values of  $\rho$  used for simulations. CD: cancer-deaths; NCD: non-cancer deaths; Rec: recurrences.

# Scenario 1: $HR_{CD} = 1, HR_{NCD} = 1$

## Without misclassified causes of death

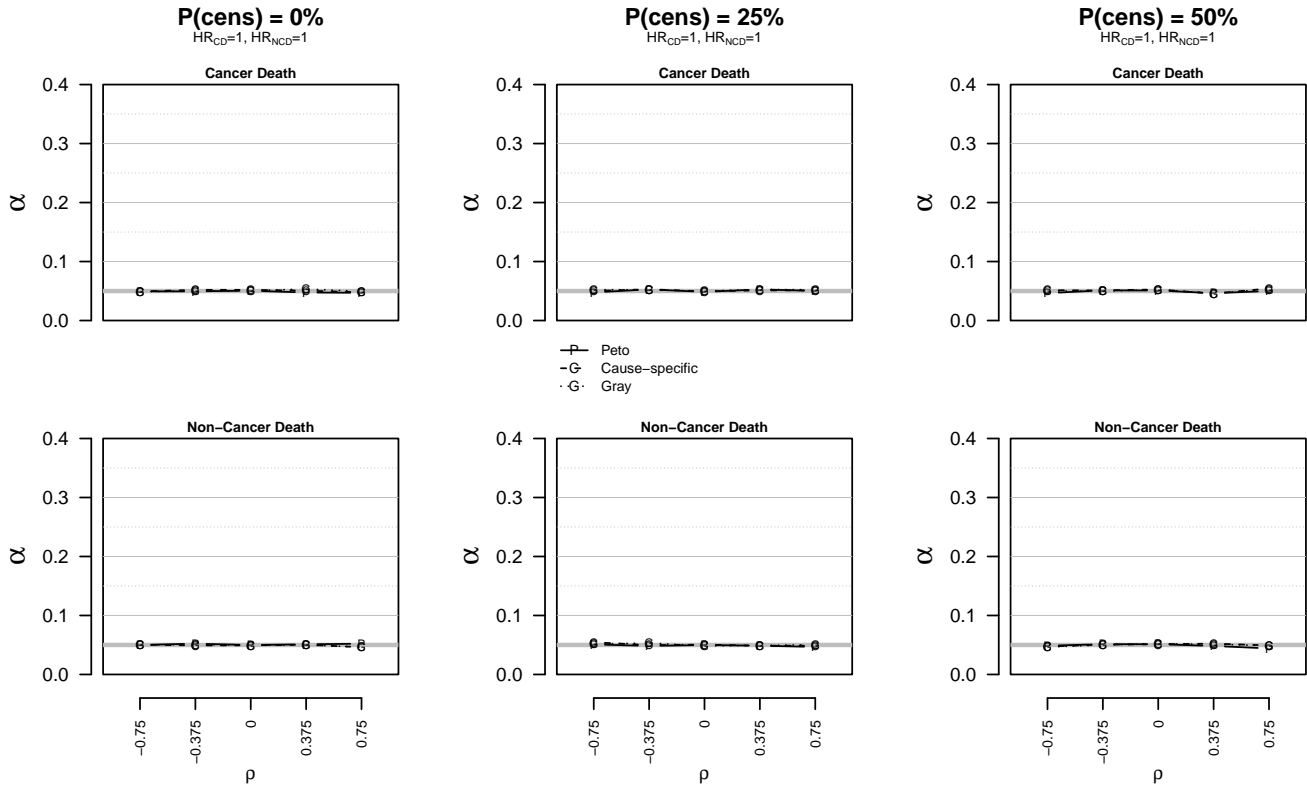

Figure A.2: **Empirical rejection probabilities of the tests in scenario 1 without misclassified causes of death.** Empirical level ( $\alpha$ ) of the tests for CD and NCD in scenario 1 ( $HR_{CD} = 1, HR_{NCD} = 1$ ). The plots on the first line concern CD, those on the second line NCD. From left to right, the data are simulated with 0% ( $P(\text{cens}) = 0\%$ ), 25% ( $P(\text{cens}) = 25\%$ ) and 50% ( $P(\text{cens}) = 50\%$ ) censored observations. The grey horizontal line corresponds to the 0.05 level. 10 000 repetitions.

Table A.1: **Empirical rejection probabilities of the tests in scenario 1 without misclassified causes of death.** Empirical level ( $\alpha$ ) of the tests for CD and NCD in scenario 1 ( $HR_{CD} = 1, HR_{NCD} = 1$ ). 10 000 repetitions.

| $\rho$ | Cancer deaths     |       |       |               |       |       |               |       |       |
|--------|-------------------|-------|-------|---------------|-------|-------|---------------|-------|-------|
|        | P(cens) = 0%      |       |       | P(cens) = 25% |       |       | P(cens) = 50% |       |       |
|        | Pe                | CS    | Gr    | Pe            | CS    | Gr    | Pe            | CS    | Gr    |
| -0.750 | 0.049             | 0.049 | 0.049 | 0.048         | 0.050 | 0.052 | 0.046         | 0.051 | 0.050 |
| -0.375 | 0.050             | 0.052 | 0.050 | 0.053         | 0.053 | 0.052 | 0.051         | 0.051 | 0.050 |
| 0.000  | 0.051             | 0.052 | 0.051 | 0.048         | 0.049 | 0.050 | 0.051         | 0.053 | 0.052 |
| 0.375  | 0.048             | 0.051 | 0.053 | 0.053         | 0.051 | 0.053 | 0.046         | 0.046 | 0.046 |
| 0.750  | 0.047             | 0.048 | 0.049 | 0.050         | 0.051 | 0.052 | 0.050         | 0.054 | 0.053 |
| $\rho$ | Non-cancer deaths |       |       |               |       |       |               |       |       |
|        | P(cens) = 0%      |       |       | P(cens) = 25% |       |       | P(cens) = 50% |       |       |
|        | Pe                | CS    | Gr    | Pe            | CS    | Gr    | Pe            | CS    | Gr    |
| -0.750 | 0.050             | 0.050 | 0.050 | 0.051         | 0.055 | 0.052 | 0.049         | 0.047 | 0.046 |
| -0.375 | 0.052             | 0.049 | 0.051 | 0.048         | 0.050 | 0.053 | 0.051         | 0.051 | 0.050 |
| 0.000  | 0.050             | 0.049 | 0.049 | 0.050         | 0.051 | 0.048 | 0.051         | 0.051 | 0.052 |
| 0.375  | 0.051             | 0.050 | 0.050 | 0.049         | 0.049 | 0.049 | 0.048         | 0.052 | 0.051 |
| 0.750  | 0.052             | 0.046 | 0.046 | 0.047         | 0.049 | 0.050 | 0.044         | 0.049 | 0.049 |

# Scenario 1: $HR_{CD} = 1, HR_{NCD} = 1$

With 20% misclassified causes of death

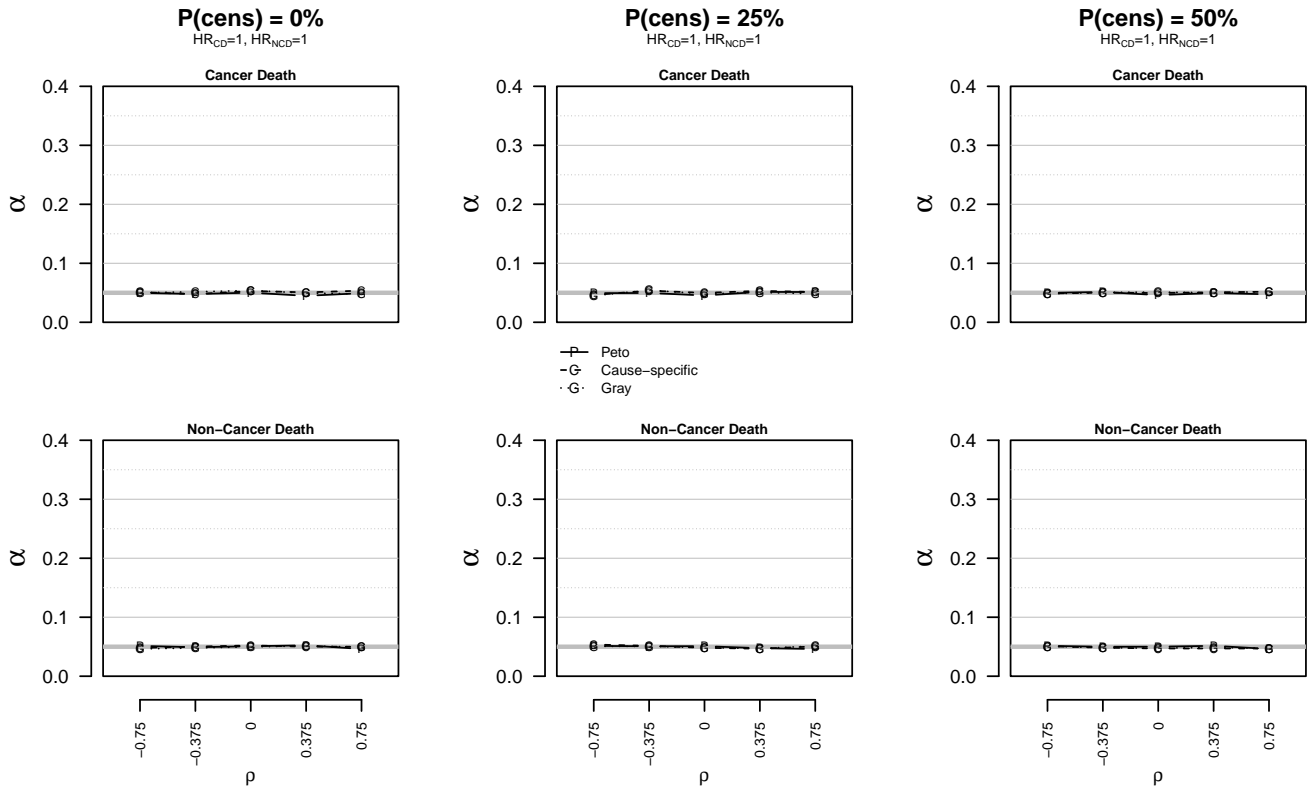

Figure A.3: **Empirical rejection probabilities of the tests in scenario 1 with 20% misclassified causes of death.** Empirical level ( $\alpha$ ) of the tests for CD and NCD in scenario 1 ( $HR_{CD} = 1, HR_{NCD} = 1$ ). The plots on the first line concern CD, those on the second line NCD. From left to right, the data are simulated with 0% ( $P(\text{cens}) = 0\%$ ), 25% ( $P(\text{cens}) = 25\%$ ) and 50% ( $P(\text{cens}) = 50\%$ ) censored observations. The grey horizontal line corresponds to the 0.05 level. 10 000 repetitions.

Table A.2: **Empirical rejection probabilities of the tests in scenario 1 with 20% misclassified causes of death.** Empirical level ( $\alpha$ ) of the tests for CD and NCD in scenario 1 ( $HR_{CD} = 1, HR_{NCD} = 1$ ). 10 000 repetitions.

| $\rho$ | Cancer deaths     |       |       |               |       |       |               |       |       |
|--------|-------------------|-------|-------|---------------|-------|-------|---------------|-------|-------|
|        | P(cens) = 0%      |       |       | P(cens) = 25% |       |       | P(cens) = 50% |       |       |
|        | Pe                | CS    | Gr    | Pe            | CS    | Gr    | Pe            | CS    | Gr    |
| -0.750 | 0.050             | 0.051 | 0.050 | 0.049         | 0.046 | 0.045 | 0.050         | 0.049 | 0.048 |
| -0.375 | 0.048             | 0.048 | 0.052 | 0.050         | 0.054 | 0.054 | 0.051         | 0.050 | 0.051 |
| 0.000  | 0.050             | 0.053 | 0.054 | 0.045         | 0.050 | 0.048 | 0.046         | 0.050 | 0.051 |
| 0.375  | 0.045             | 0.051 | 0.050 | 0.052         | 0.053 | 0.050 | 0.050         | 0.051 | 0.050 |
| 0.750  | 0.049             | 0.054 | 0.048 | 0.051         | 0.051 | 0.048 | 0.047         | 0.052 | 0.052 |
| $\rho$ | Non-cancer deaths |       |       |               |       |       |               |       |       |
|        | P(cens) = 0%      |       |       | P(cens) = 25% |       |       | P(cens) = 50% |       |       |
|        | Pe                | CS    | Gr    | Pe            | CS    | Gr    | Pe            | CS    | Gr    |
| -0.750 | 0.051             | 0.048 | 0.046 | 0.051         | 0.054 | 0.051 | 0.052         | 0.051 | 0.051 |
| -0.375 | 0.049             | 0.050 | 0.048 | 0.051         | 0.052 | 0.051 | 0.050         | 0.048 | 0.048 |
| 0.000  | 0.051             | 0.052 | 0.050 | 0.051         | 0.048 | 0.049 | 0.050         | 0.047 | 0.048 |
| 0.375  | 0.052             | 0.050 | 0.051 | 0.048         | 0.047 | 0.047 | 0.052         | 0.047 | 0.049 |
| 0.750  | 0.046             | 0.050 | 0.049 | 0.046         | 0.050 | 0.051 | 0.046         | 0.047 | 0.047 |

**Scenario 2:**  $HR_{CD} = 1, HR_{NCD} = 1.25$

**Without misclassified causes of death**

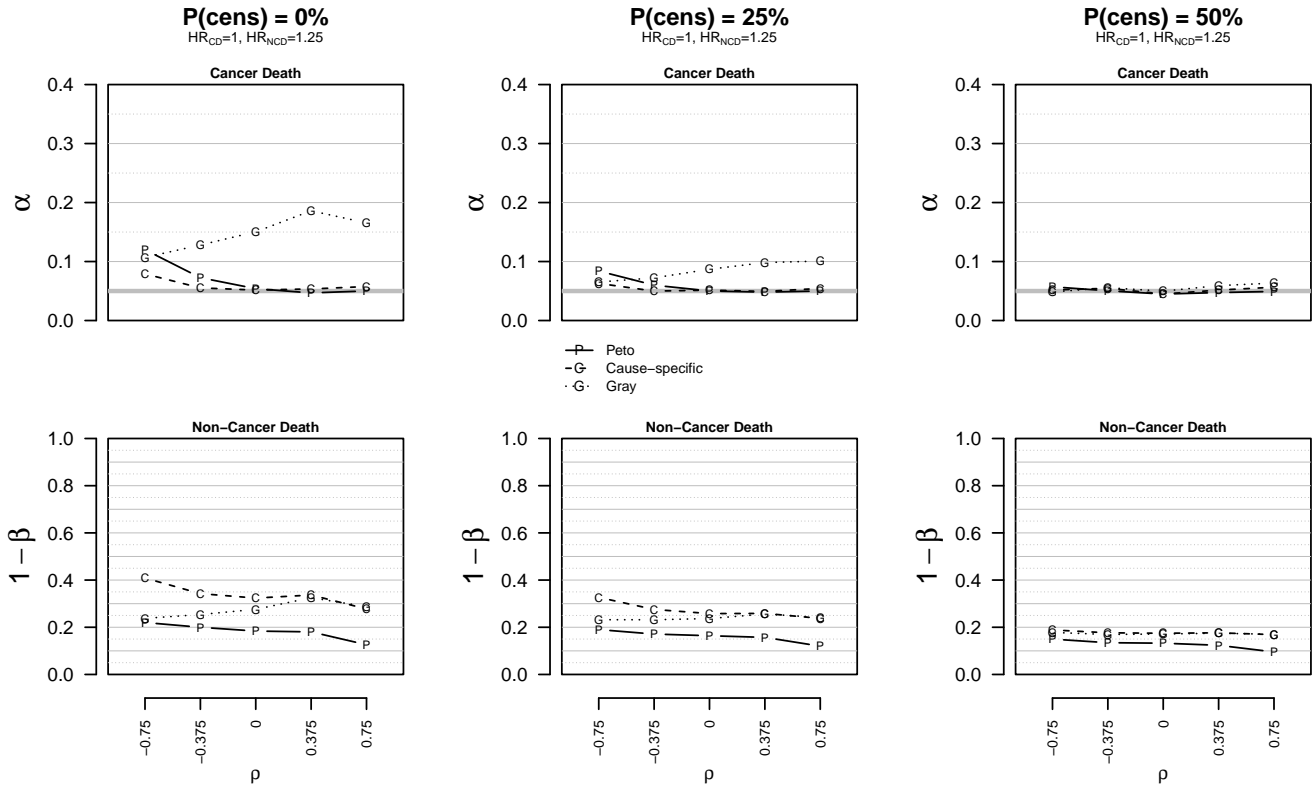

Figure A.4: **Empirical rejection probabilities of the tests in scenario 2 without misclassified causes of death.** Empirical level ( $\alpha$ ) and power ( $1 - \beta$ ) of the tests for CD and NCD in scenario 2 ( $HR_{CD} = 1, HR_{NCD} = 1.25$ ). The plots on the first line concern CD, those on the second line NCD. From left to right, the data are simulated with 0% ( $P(\text{cens}) = 0\%$ ), 25% ( $P(\text{cens}) = 25\%$ ) and 50% ( $P(\text{cens}) = 50\%$ ) censored observations. The grey horizontal line corresponds to the 0.05 level. 10 000 repetitions.

Table A.3: **Empirical rejection probabilities of the tests in scenario 2 without misclassified causes of death.** Empirical level ( $\alpha$ ) and power ( $1 - \beta$ ) of the tests for CD and NCD in scenario 2 ( $HR_{CD} = 1, HR_{NCD} = 1.25$ ). 10 000 repetitions.

| Cancer deaths |              |       |       |               |       |       |               |       |       |
|---------------|--------------|-------|-------|---------------|-------|-------|---------------|-------|-------|
| $\rho$        | P(cens) = 0% |       |       | P(cens) = 25% |       |       | P(cens) = 50% |       |       |
|               | Pe           | CS    | Gr    | Pe            | CS    | Gr    | Pe            | CS    | Gr    |
| -0.750        | 0.120        | 0.079 | 0.107 | 0.084         | 0.063 | 0.065 | 0.057         | 0.052 | 0.048 |
| -0.375        | 0.073        | 0.055 | 0.128 | 0.060         | 0.050 | 0.072 | 0.050         | 0.055 | 0.056 |
| 0.000         | 0.054        | 0.052 | 0.150 | 0.050         | 0.052 | 0.087 | 0.045         | 0.045 | 0.050 |
| 0.375         | 0.047        | 0.054 | 0.186 | 0.048         | 0.049 | 0.098 | 0.047         | 0.052 | 0.059 |
| 0.750         | 0.050        | 0.058 | 0.166 | 0.050         | 0.054 | 0.101 | 0.049         | 0.056 | 0.064 |

  

| Non-cancer deaths |              |       |       |               |       |       |               |       |       |
|-------------------|--------------|-------|-------|---------------|-------|-------|---------------|-------|-------|
| $\rho$            | P(cens) = 0% |       |       | P(cens) = 25% |       |       | P(cens) = 50% |       |       |
|                   | Pe           | CS    | Gr    | Pe            | CS    | Gr    | Pe            | CS    | Gr    |
| -0.750            | 0.220        | 0.409 | 0.238 | 0.190         | 0.327 | 0.232 | 0.150         | 0.189 | 0.178 |
| -0.375            | 0.200        | 0.342 | 0.254 | 0.171         | 0.276 | 0.232 | 0.134         | 0.177 | 0.169 |
| 0.000             | 0.184        | 0.324 | 0.276 | 0.164         | 0.258 | 0.237 | 0.132         | 0.175 | 0.172 |
| 0.375             | 0.180        | 0.337 | 0.325 | 0.157         | 0.259 | 0.256 | 0.124         | 0.176 | 0.175 |
| 0.750             | 0.126        | 0.278 | 0.287 | 0.120         | 0.238 | 0.242 | 0.095         | 0.169 | 0.170 |

**Scenario 2:**  $HR_{CD} = 1, HR_{NCD} = 1.25$

With 20% misclassified causes of death

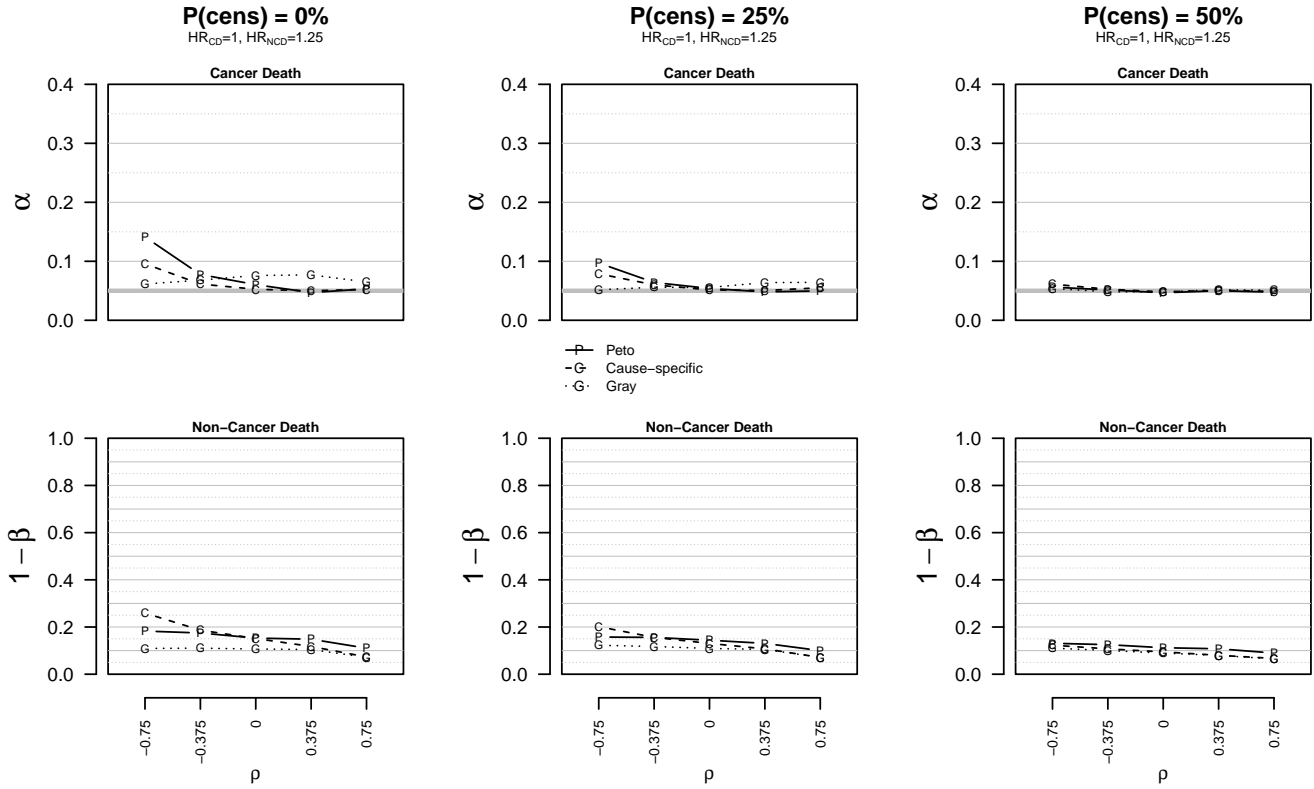

Figure A.5: **Empirical rejection probabilities of the tests in scenario 2 with 20% misclassified causes of death.** Empirical level ( $\alpha$ ) and power ( $1 - \beta$ ) of the tests for CD and NCD in scenario 2 ( $HR_{CD} = 1, HR_{NCD} = 1.25$ ). The plots on the first line concern CD, those on the second line NCD. From left to right, the data are simulated with 0% ( $P(\text{cens}) = 0\%$ ), 25% ( $P(\text{cens}) = 25\%$ ) and 50% ( $P(\text{cens}) = 50\%$ ) censored observations. The grey horizontal line corresponds to the 0.05 level. 10 000 repetitions.

Table A.4: **Empirical rejection probabilities of the tests in scenario 2 with 20% misclassified causes of death.** Empirical level ( $\alpha$ ) and power ( $1 - \beta$ ) of the tests for CD and NCD in scenario 2 ( $HR_{CD} = 1, HR_{NCD} = 1.25$ ). 10 000 repetitions.

| Cancer deaths     |              |       |       |               |       |       |               |       |       |
|-------------------|--------------|-------|-------|---------------|-------|-------|---------------|-------|-------|
| $\rho$            | P(cens) = 0% |       |       | P(cens) = 25% |       |       | P(cens) = 50% |       |       |
|                   | Pe           | CS    | Gr    | Pe            | CS    | Gr    | Pe            | CS    | Gr    |
| -0.750            | 0.141        | 0.096 | 0.062 | 0.097         | 0.079 | 0.052 | 0.056         | 0.061 | 0.054 |
| -0.375            | 0.078        | 0.061 | 0.068 | 0.064         | 0.060 | 0.056 | 0.052         | 0.053 | 0.048 |
| 0.000             | 0.060        | 0.053 | 0.076 | 0.054         | 0.052 | 0.056 | 0.047         | 0.048 | 0.048 |
| 0.375             | 0.047        | 0.050 | 0.077 | 0.048         | 0.050 | 0.064 | 0.050         | 0.051 | 0.052 |
| 0.750             | 0.053        | 0.052 | 0.065 | 0.050         | 0.055 | 0.064 | 0.048         | 0.049 | 0.051 |
| Non-cancer deaths |              |       |       |               |       |       |               |       |       |
| $\rho$            | P(cens) = 0% |       |       | P(cens) = 25% |       |       | P(cens) = 50% |       |       |
|                   | Pe           | CS    | Gr    | Pe            | CS    | Gr    | Pe            | CS    | Gr    |
| -0.750            | 0.183        | 0.259 | 0.109 | 0.158         | 0.201 | 0.123 | 0.131         | 0.123 | 0.110 |
| -0.375            | 0.175        | 0.187 | 0.110 | 0.156         | 0.156 | 0.117 | 0.125         | 0.107 | 0.101 |
| 0.000             | 0.153        | 0.151 | 0.107 | 0.144         | 0.130 | 0.109 | 0.112         | 0.095 | 0.090 |
| 0.375             | 0.148        | 0.118 | 0.105 | 0.131         | 0.108 | 0.105 | 0.108         | 0.080 | 0.080 |
| 0.750             | 0.110        | 0.073 | 0.072 | 0.100         | 0.071 | 0.071 | 0.090         | 0.067 | 0.065 |

**Scenario 3:**  $HR_{CD} = 0.8, HR_{NCD} = 1$

Without misclassified causes of death

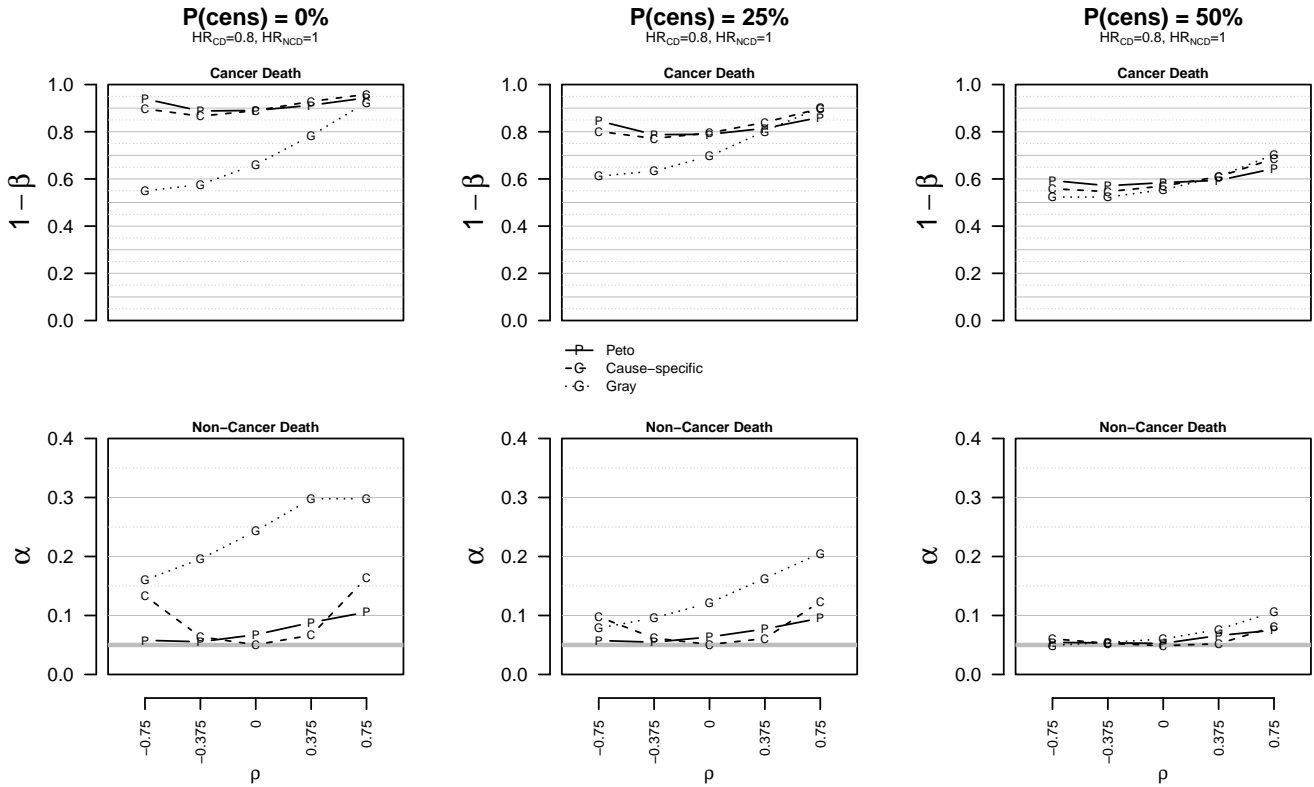

Figure A.6: **Empirical rejection probabilities of the tests in scenario 3 without misclassified causes of death.** Empirical power ( $1 - \beta$ ) and level ( $\alpha$ ) of the tests for CD and NCD in scenario 3 ( $HR_{CD} = 0.8, HR_{NCD} = 1$ ). The plots on the first line concern CD, those on the second line NCD. From left to right, the data are simulated with 0% ( $P(\text{cens}) = 0\%$ ), 25% ( $P(\text{cens}) = 25\%$ ) and 50% ( $P(\text{cens}) = 50\%$ ) censored observations. The grey horizontal line corresponds to the 0.05 level. 10 000 repetitions.

Table A.5: **Empirical rejection probabilities of the tests in scenario 3 without misclassified causes of death.** Empirical power ( $1 - \beta$ ) and level ( $\alpha$ ) of the tests for CD and NCD in scenario 3 ( $HR_{CD} = 0.8, HR_{NCD} = 1$ ). 10 000 repetitions.

| $\rho$ | Cancer deaths |       |       |               |       |       |               |       |       |
|--------|---------------|-------|-------|---------------|-------|-------|---------------|-------|-------|
|        | P(cens) = 0%  |       |       | P(cens) = 25% |       |       | P(cens) = 50% |       |       |
|        | Pe            | CS    | Gr    | Pe            | CS    | Gr    | Pe            | CS    | Gr    |
| -0.750 | 0.940         | 0.897 | 0.549 | 0.846         | 0.801 | 0.612 | 0.593         | 0.559 | 0.523 |
| -0.375 | 0.888         | 0.866 | 0.576 | 0.788         | 0.772 | 0.633 | 0.571         | 0.546 | 0.523 |
| 0.000  | 0.890         | 0.890 | 0.661 | 0.789         | 0.795 | 0.696 | 0.584         | 0.570 | 0.554 |
| 0.375  | 0.912         | 0.928 | 0.784 | 0.815         | 0.840 | 0.802 | 0.594         | 0.609 | 0.610 |
| 0.750  | 0.944         | 0.959 | 0.924 | 0.861         | 0.898 | 0.904 | 0.644         | 0.686 | 0.704 |

  

| $\rho$ | Non-cancer deaths |       |       |               |       |       |               |       |       |
|--------|-------------------|-------|-------|---------------|-------|-------|---------------|-------|-------|
|        | P(cens) = 0%      |       |       | P(cens) = 25% |       |       | P(cens) = 50% |       |       |
|        | Pe                | CS    | Gr    | Pe            | CS    | Gr    | Pe            | CS    | Gr    |
| -0.750 | 0.058             | 0.133 | 0.160 | 0.058         | 0.098 | 0.079 | 0.054         | 0.060 | 0.049 |
| -0.375 | 0.055             | 0.064 | 0.196 | 0.055         | 0.062 | 0.096 | 0.054         | 0.053 | 0.054 |
| 0.000  | 0.067             | 0.050 | 0.243 | 0.064         | 0.051 | 0.121 | 0.053         | 0.049 | 0.060 |
| 0.375  | 0.088             | 0.066 | 0.298 | 0.077         | 0.061 | 0.163 | 0.066         | 0.052 | 0.076 |
| 0.750  | 0.106             | 0.164 | 0.298 | 0.095         | 0.124 | 0.205 | 0.075         | 0.081 | 0.106 |

**Scenario 3:**  $HR_{CD} = 0.8, HR_{NCD} = 1$

With 20% misclassified causes of death

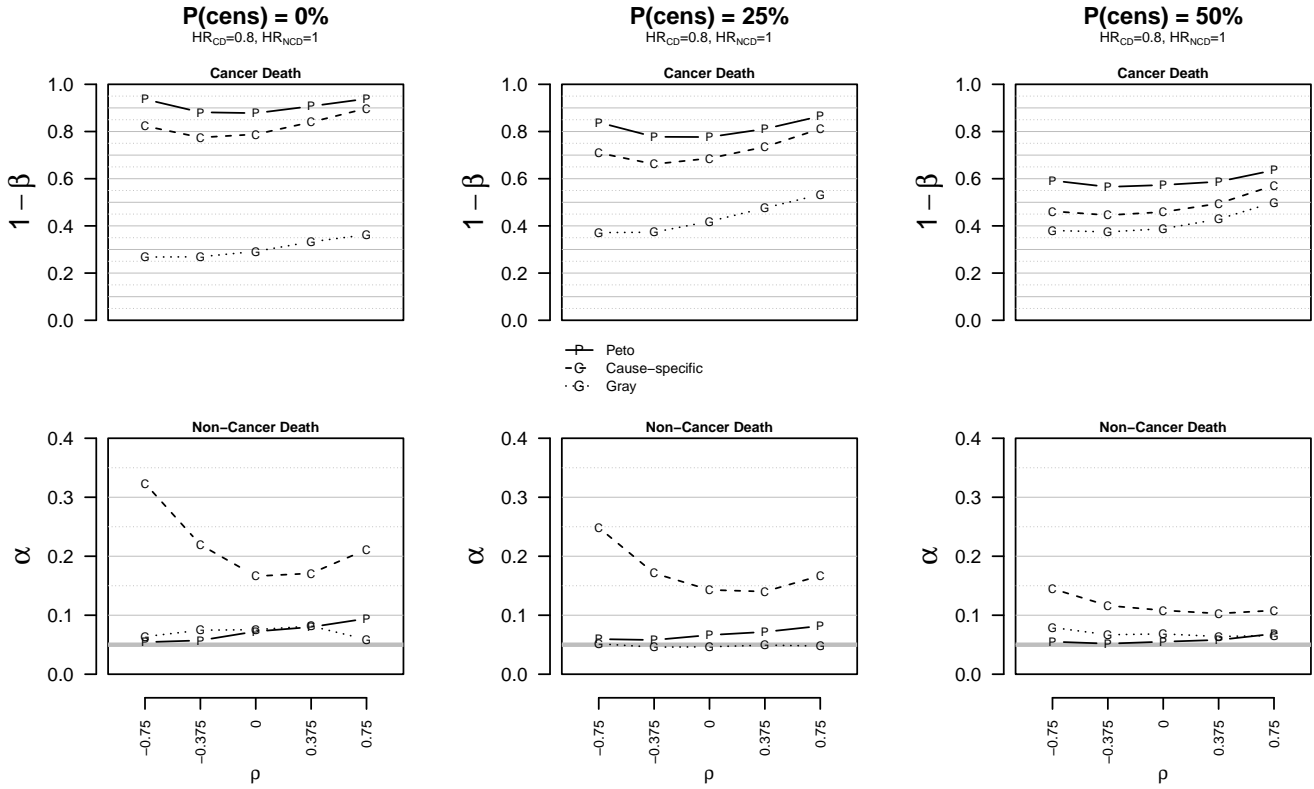

Figure A.7: **Empirical rejection probabilities of the tests in scenario 3 with 20% misclassified causes of death.** Empirical power ( $1 - \beta$ ) and level ( $\alpha$ ) of the tests for CD and NCD in scenario 3 ( $HR_{CD} = 0.8, HR_{NCD} = 1$ ). The plots on the first line concern CD, those on the second line NCD. From left to right, the data are simulated with 0% ( $P(\text{cens}) = 0\%$ ), 25% ( $P(\text{cens}) = 25\%$ ) and 50% ( $P(\text{cens}) = 50\%$ ) censored observations. The grey horizontal line corresponds to the 0.05 level. 10 000 repetitions.

Table A.6: **Empirical rejection probabilities of the tests in scenario 3 with 20% misclassified causes of death.** Empirical power ( $1 - \beta$ ) and level ( $\alpha$ ) of the tests for CD and NCD in scenario 3 ( $HR_{CD} = 0.8, HR_{NCD} = 1$ ). 10 000 repetitions.

| $\rho$ | Cancer deaths     |       |       |               |       |       |               |       |       |
|--------|-------------------|-------|-------|---------------|-------|-------|---------------|-------|-------|
|        | P(cens) = 0%      |       |       | P(cens) = 25% |       |       | P(cens) = 50% |       |       |
|        | Pe                | CS    | Gr    | Pe            | CS    | Gr    | Pe            | CS    | Gr    |
| -0.750 | 0.937             | 0.823 | 0.268 | 0.839         | 0.709 | 0.372 | 0.592         | 0.462 | 0.380 |
| -0.375 | 0.882             | 0.775 | 0.269 | 0.778         | 0.662 | 0.373 | 0.565         | 0.446 | 0.374 |
| 0.000  | 0.878             | 0.788 | 0.292 | 0.776         | 0.686 | 0.419 | 0.573         | 0.459 | 0.388 |
| 0.375  | 0.907             | 0.840 | 0.333 | 0.811         | 0.735 | 0.476 | 0.587         | 0.495 | 0.428 |
| 0.750  | 0.939             | 0.898 | 0.363 | 0.865         | 0.811 | 0.532 | 0.636         | 0.571 | 0.500 |
| $\rho$ | Non-cancer deaths |       |       |               |       |       |               |       |       |
|        | P(cens) = 0%      |       |       | P(cens) = 25% |       |       | P(cens) = 50% |       |       |
|        | Pe                | CS    | Gr    | Pe            | CS    | Gr    | Pe            | CS    | Gr    |
| -0.750 | 0.054             | 0.324 | 0.064 | 0.060         | 0.248 | 0.052 | 0.055         | 0.145 | 0.079 |
| -0.375 | 0.057             | 0.220 | 0.075 | 0.058         | 0.171 | 0.046 | 0.052         | 0.116 | 0.067 |
| 0.000  | 0.072             | 0.166 | 0.076 | 0.066         | 0.143 | 0.046 | 0.055         | 0.108 | 0.068 |
| 0.375  | 0.080             | 0.171 | 0.082 | 0.072         | 0.140 | 0.049 | 0.058         | 0.103 | 0.064 |
| 0.750  | 0.094             | 0.211 | 0.059 | 0.082         | 0.167 | 0.048 | 0.068         | 0.108 | 0.066 |

**Scenario 4:**  $HR_{CD} = 0.8, HR_{NCD} = 1.25$

Without misclassified causes of death

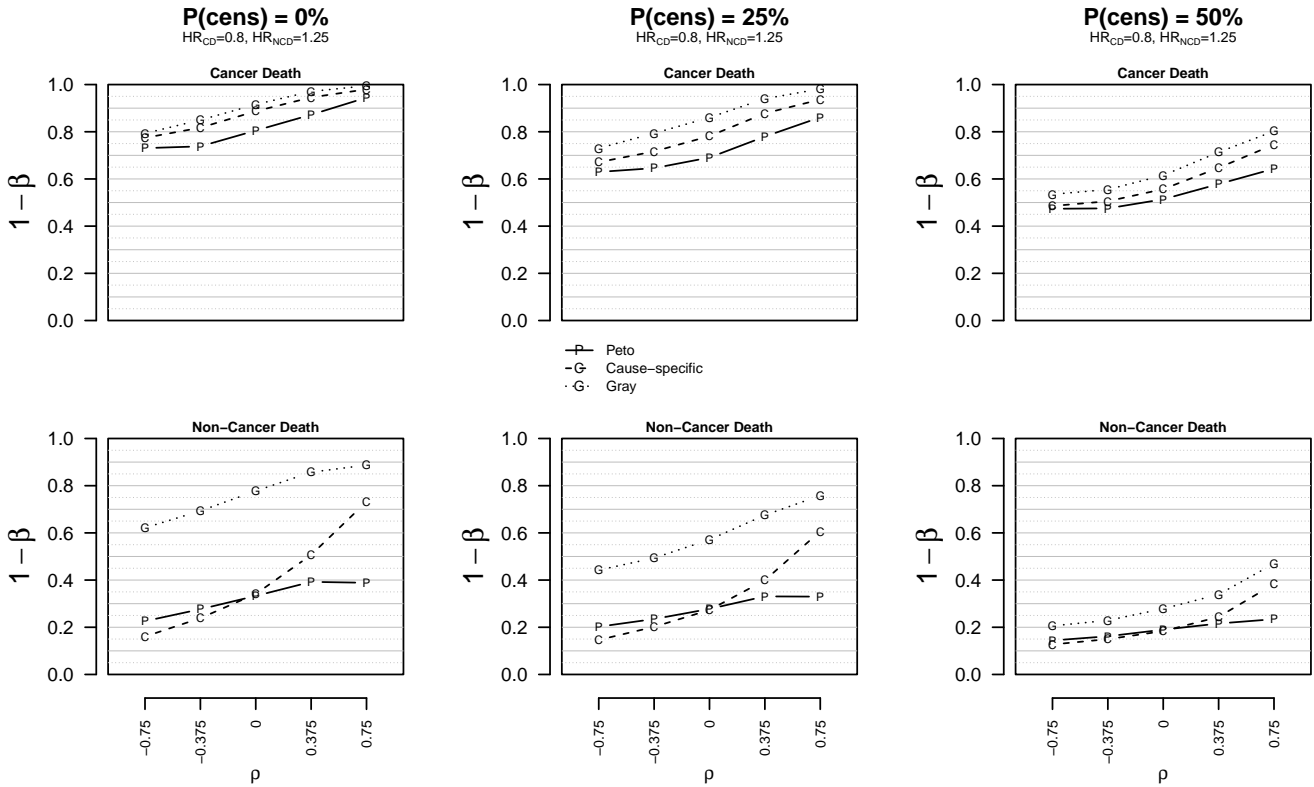

Figure A.8: **Empirical rejection probabilities of the tests in scenario 4 without misclassified causes of death.** Empirical power ( $1 - \beta$ ) of the tests for CD and NCD in scenario 4 ( $HR_{CD} = 0.8, HR_{NCD} = 1.25$ ). The plots on the first line concern CD, those on the second line NCD. From left to right, the data are simulated with 0% ( $P(\text{cens}) = 0\%$ ), 25% ( $P(\text{cens}) = 25\%$ ) and 50% ( $P(\text{cens}) = 50\%$ ) censored observations. 10 000 repetitions.

Table A.7: **Empirical rejection probabilities of the tests in scenario 4 without misclassified causes of death.** Empirical power ( $1 - \beta$ ) of the tests for CD and NCD in scenario 4 ( $HR_{CD} = 0.8, HR_{NCD} = 1.25$ ). 10 000 repetitions.

| $\rho$ | Cancer deaths |       |       |               |       |       |               |       |       |
|--------|---------------|-------|-------|---------------|-------|-------|---------------|-------|-------|
|        | P(cens) = 0%  |       |       | P(cens) = 25% |       |       | P(cens) = 50% |       |       |
|        | Pe            | CS    | Gr    | Pe            | CS    | Gr    | Pe            | CS    | Gr    |
| -0.750 | 0.731         | 0.774 | 0.793 | 0.630         | 0.671 | 0.730 | 0.474         | 0.486 | 0.535 |
| -0.375 | 0.738         | 0.817 | 0.850 | 0.646         | 0.716 | 0.794 | 0.475         | 0.505 | 0.555 |
| 0.000  | 0.805         | 0.887 | 0.916 | 0.691         | 0.782 | 0.860 | 0.514         | 0.557 | 0.615 |
| 0.375  | 0.872         | 0.946 | 0.971 | 0.780         | 0.878 | 0.940 | 0.578         | 0.647 | 0.713 |
| 0.750  | 0.945         | 0.980 | 0.995 | 0.861         | 0.937 | 0.982 | 0.643         | 0.746 | 0.802 |

  

| $\rho$ | Non-cancer deaths |       |       |               |       |       |               |       |       |
|--------|-------------------|-------|-------|---------------|-------|-------|---------------|-------|-------|
|        | P(cens) = 0%      |       |       | P(cens) = 25% |       |       | P(cens) = 50% |       |       |
|        | Pe                | CS    | Gr    | Pe            | CS    | Gr    | Pe            | CS    | Gr    |
| -0.750 | 0.226             | 0.161 | 0.621 | 0.202         | 0.146 | 0.442 | 0.144         | 0.127 | 0.206 |
| -0.375 | 0.276             | 0.239 | 0.693 | 0.235         | 0.202 | 0.494 | 0.162         | 0.150 | 0.229 |
| 0.000  | 0.333             | 0.341 | 0.778 | 0.278         | 0.273 | 0.571 | 0.190         | 0.184 | 0.279 |
| 0.375  | 0.392             | 0.507 | 0.857 | 0.331         | 0.399 | 0.675 | 0.216         | 0.244 | 0.339 |
| 0.750  | 0.389             | 0.732 | 0.887 | 0.330         | 0.607 | 0.758 | 0.234         | 0.383 | 0.470 |



## Scenario 4: $HR_{CD} = 0.8, HR_{NCD} = 1.25$

With 20% misclassified causes of death

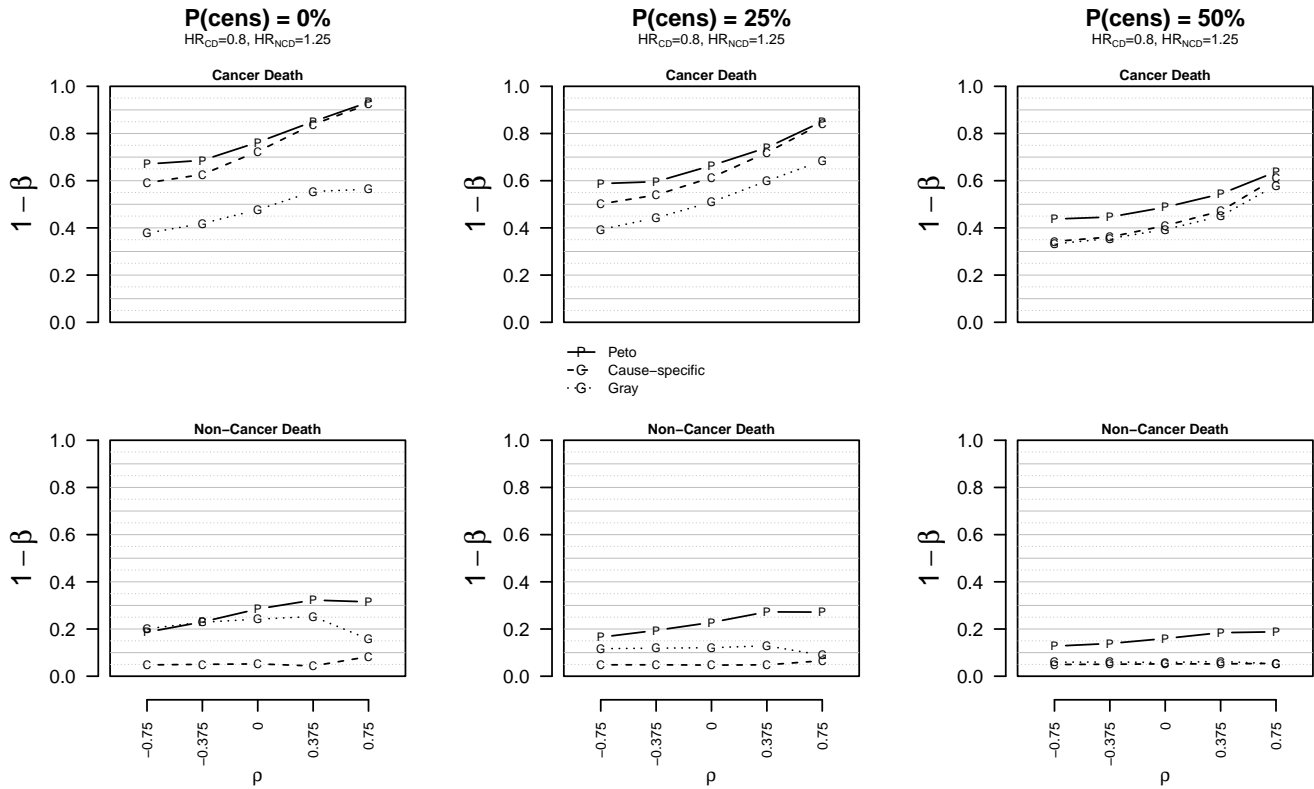

Figure A.9: **Empirical rejection probabilities of the tests in scenario 4 with 20% misclassified causes of death.** Empirical power ( $1 - \beta$ ) of the tests for CD and NCD in scenario 4 ( $HR_{CD} = 0.8, HR_{NCD} = 1.25$ ). The plots on the first line concern CD, those on the second line NCD. From left to right, the data are simulated with 0% ( $P(\text{cens}) = 0\%$ ), 25% ( $P(\text{cens}) = 25\%$ ) and 50% ( $P(\text{cens}) = 50\%$ ) censored observations. 10 000 repetitions.

Table A.8: **Empirical rejection probabilities of the tests in scenario 4 with 20% misclassified causes of death.** Empirical power ( $1 - \beta$ ) of the tests for CD and NCD in scenario 4 ( $HR_{CD} = 0.8, HR_{NCD} = 1.25$ ). 10 000 repetitions.

| $\rho$ | Cancer deaths |       |       |               |       |       |               |       |       |
|--------|---------------|-------|-------|---------------|-------|-------|---------------|-------|-------|
|        | P(cens) = 0%  |       |       | P(cens) = 25% |       |       | P(cens) = 50% |       |       |
|        | Pe            | CS    | Gr    | Pe            | CS    | Gr    | Pe            | CS    | Gr    |
| -0.750 | 0.670         | 0.591 | 0.378 | 0.588         | 0.501 | 0.393 | 0.438         | 0.343 | 0.332 |
| -0.375 | 0.686         | 0.626 | 0.419 | 0.596         | 0.539 | 0.443 | 0.446         | 0.361 | 0.355 |
| 0.000  | 0.763         | 0.724 | 0.477 | 0.664         | 0.614 | 0.510 | 0.488         | 0.410 | 0.393 |
| 0.375  | 0.850         | 0.838 | 0.554 | 0.740         | 0.719 | 0.599 | 0.544         | 0.471 | 0.450 |
| 0.750  | 0.932         | 0.924 | 0.564 | 0.851         | 0.843 | 0.685 | 0.638         | 0.611 | 0.580 |

  

| $\rho$ | Non-cancer deaths |       |       |               |       |       |               |       |       |
|--------|-------------------|-------|-------|---------------|-------|-------|---------------|-------|-------|
|        | P(cens) = 0%      |       |       | P(cens) = 25% |       |       | P(cens) = 50% |       |       |
|        | Pe                | CS    | Gr    | Pe            | CS    | Gr    | Pe            | CS    | Gr    |
| -0.750 | 0.670             | 0.591 | 0.378 | 0.588         | 0.501 | 0.393 | 0.438         | 0.343 | 0.332 |
| -0.375 | 0.686             | 0.626 | 0.419 | 0.596         | 0.539 | 0.443 | 0.446         | 0.361 | 0.355 |
| 0.000  | 0.763             | 0.724 | 0.477 | 0.664         | 0.614 | 0.510 | 0.488         | 0.410 | 0.393 |
| 0.375  | 0.850             | 0.838 | 0.554 | 0.740         | 0.719 | 0.599 | 0.544         | 0.471 | 0.450 |
| 0.750  | 0.932             | 0.924 | 0.564 | 0.851         | 0.843 | 0.685 | 0.638         | 0.611 | 0.580 |
